# Supplementary material for: Genomic Epidemiology and Characterization of Methicillin-Resistant Staphylococcus aureus from Bloodstream Infections in China
Source: PubMed Central journal article supplement (PMC8562482; doi:10.1128/msystems.00837-21), 2021-11-02

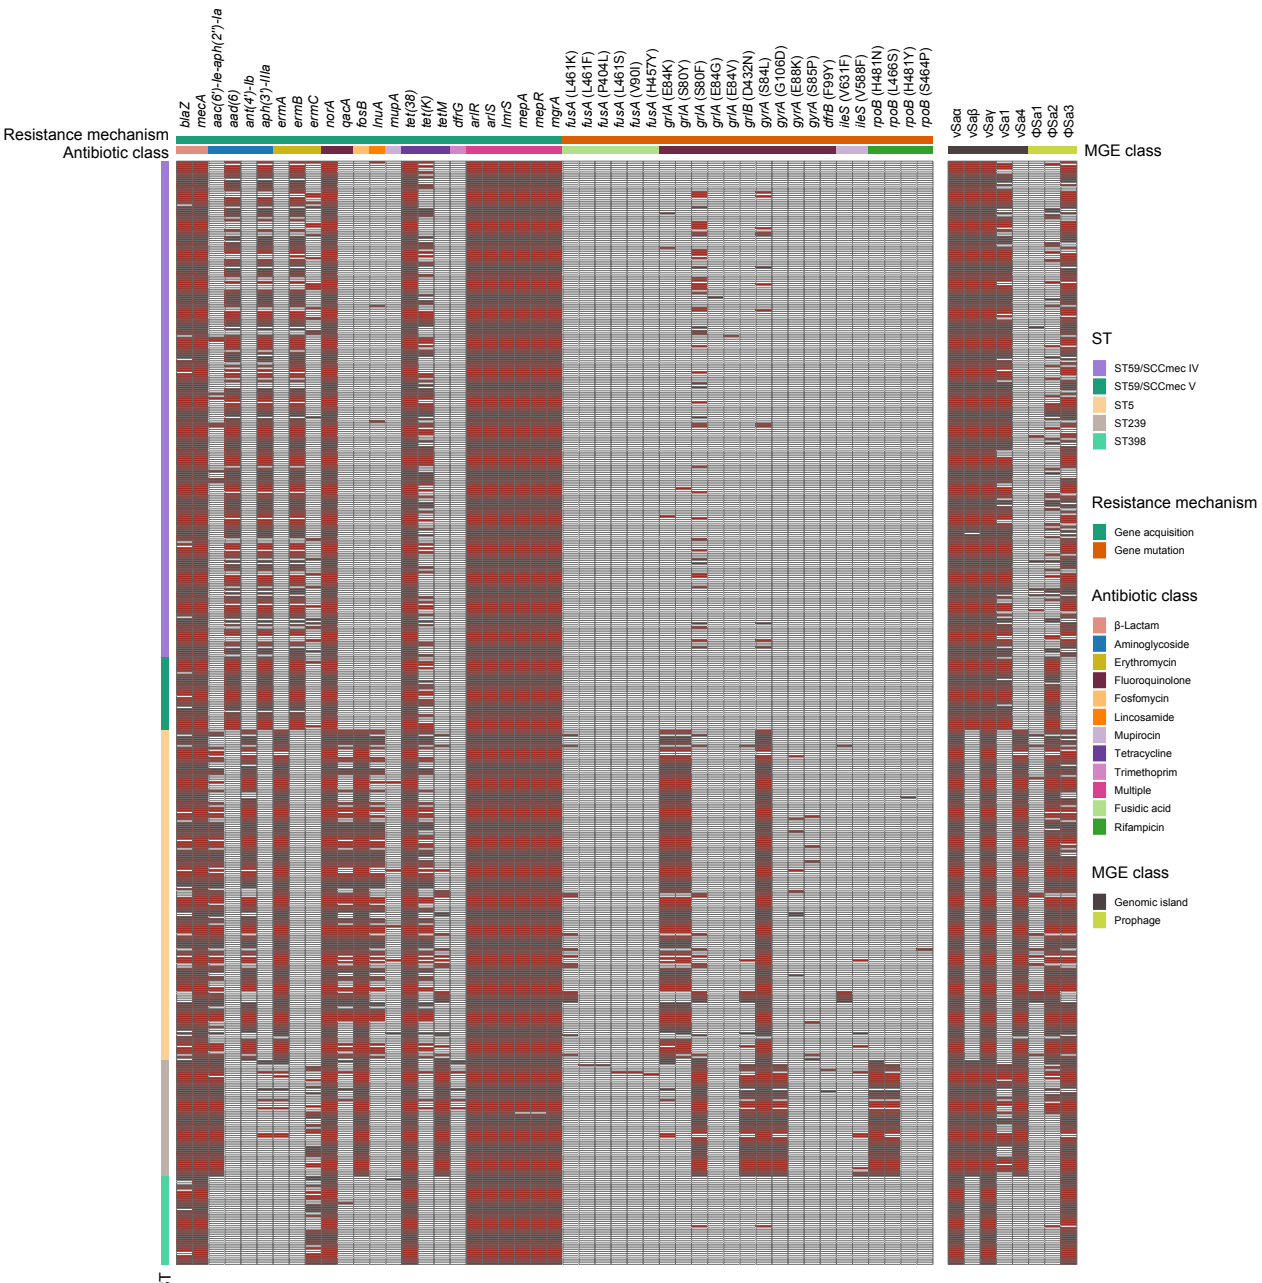

Supplement: msystems.00837-21-sf002.pdf [file msystems.00837-21-sf002.pdf]
