# Supplementary material for: Genomic Epidemiology and Characterization of Methicillin-Resistant Staphylococcus aureus from Bloodstream Infections in China
Source: PubMed Central journal article supplement (PMC8562482; doi:10.1128/msystems.00837-21), 2021-11-02
Supplement: msystems.00837-21-sf003.pdf [file msystems.00837-21-sf003.pdf]

ST

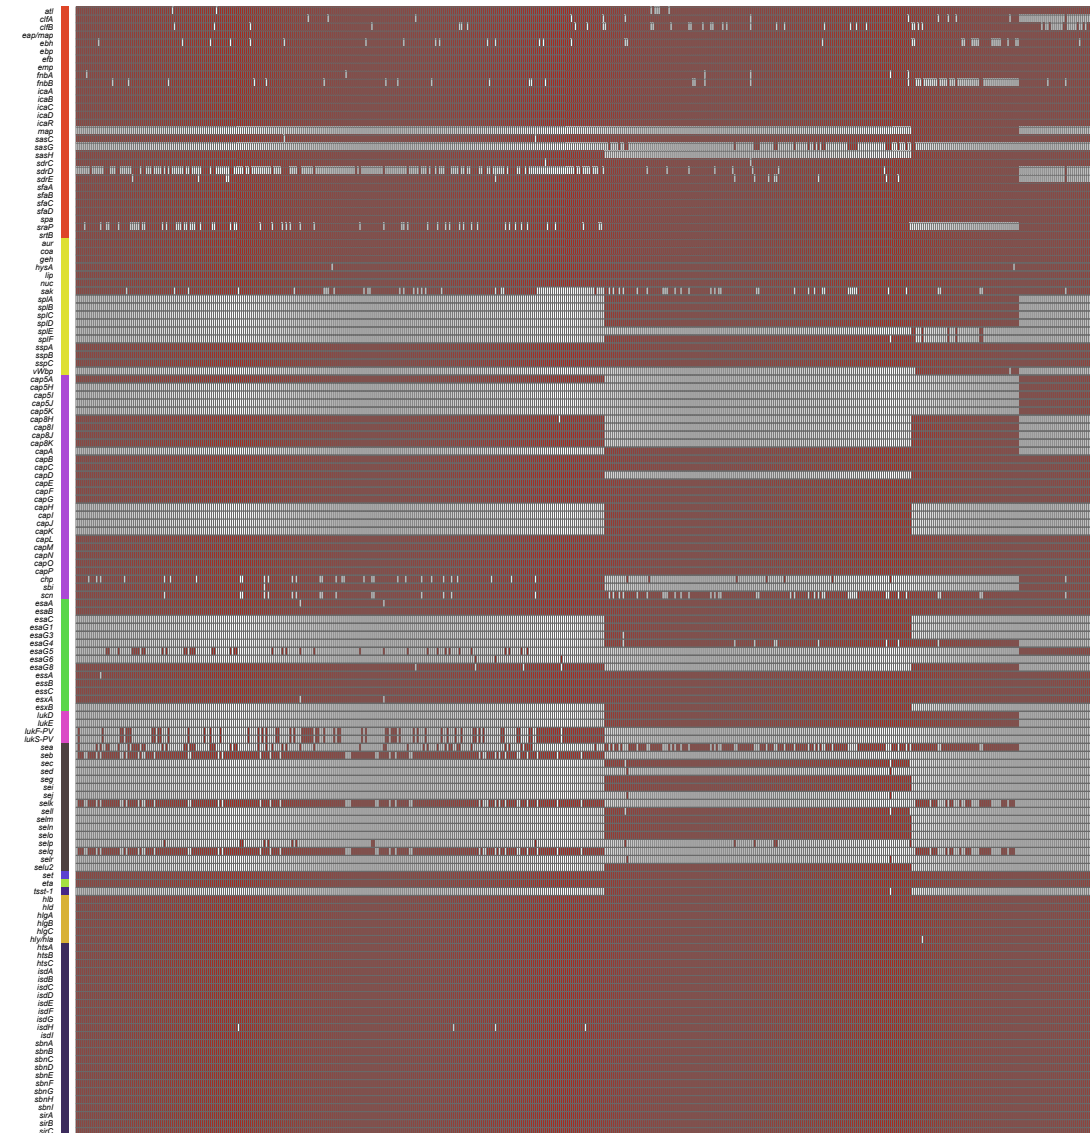

ST

- ST59/SCCmec IV
- ST59/SCCmec V
- ST5
- ST239
- ST398

Virulence factor

- Adherence
- Enzyme
- Immune evasion
- Secretion system
- Leukocidin
- Enterotoxin
- Exotoxin
- Exfoliative toxin
- Toxic shock syndrome toxin
- Hemolysin
- Iron uptake

Virulence factor
